# Supplementary material for: Tetranitratoethane
Source: Royal Society of Chemistry journal article supplement (doi:10.1039/c5cc09010e), 2015-11-13
Supplement: c5cc09010e1.pdf [file c5cc09010e1.pdf]

## Supplementary Information

### Tetranitratoethane

Dennis Fischer, Thomas M. Klapötke\*, Jörg Stierstorfer

*Energetic Materials Research, Department of Chemistry,  
University of Munich (LMU), Butenandtstr. 5-13, D-81377, Germany  
Fax: +49 89 2180 77492  
E-mail: [tmk@cup.uni-muenchen.de](mailto:tmk@cup.uni-muenchen.de)*

### Table of contents

1. Experimental Part and General Methods
2. X-ray Diffraction
3. Heat of Formation Calculation
4. References

### 1. Experimental Part and General Methods

*Caution! Tetranitratoethane is a powerful energetic material with **high sensitivities** towards shock and friction. Therefore, proper security precautions (safety glass, face shield, earthened equipment and shoes, Kevlar gloves and ear plugs) have to be applied while synthesizing and handling the described compounds.*

Chemicals and solvents were employed as received (Sigma-Aldrich, Fluka, Acros).  $^1\text{H}$  and  $^{13}\text{C}$  spectra were recorded using a JEOL EX 400 instrument. The chemical shifts quoted in ppm in the text refer to typical standard tetramethylsilane ( $^1\text{H}$ ,  $^{13}\text{C}$ ) in  $\text{CDCl}_3$  as the solvent. A DSC measurement to determine the decomposition point was performed at a heating rate of  $5^\circ\text{C min}^{-1}$  with an Linseis PT10 instrument. Infrared spectra were measured with a Perkin–Elmer FT-IR Spectrum BXII instrument equipped with a Smith Dura SamplIR II ATR unit. Raman spectra were recorded on a Bruker MultiRAM Raman Sample Compartment D418 equipped with an Nd-YAG-Laser (1064 nm) and an LN-Ge diode as detector.

The impact sensitivity tests were carried out according to STANAG 4489<sup>1</sup> modified instruction<sup>2</sup> using a Bundesanstalt für Materialforschung (BAM) drophammer.<sup>3</sup> The friction sensitivity tests were carried out according to STANAG 4487<sup>4</sup> modified instruction<sup>5</sup> using the

BAM friction tester. The classification of the tested compounds results from the 'UN Recommendations on the Transport of Dangerous Goods'.<sup>6,7</sup>

10 g of dehydrated and powdered glyoxal were mixed with 30 g of  $P_4O_{10}$  and slowly heated with a heat gun in a 50 mL flask until the material turned black. The green vapors were introduced into an ice cooled solution of 8 g  $N_2O_5$  in 40 mL  $CH_3CN$ . Then the reaction was poured on 100 mL ice water and immediately extracted with four times 50 mL  $CH_2Cl_2$ . The organic phase was washed with 1 %  $NaHCO_3$  until neutral and dried over  $MgSO_4$ . After carefully (RT) removing the solvent under vacuum the crude material was sublimed at 70 °C under high vacuum against dry ice yielding 1 – 2 g of a colorless solid. **DSC** (5 °C min<sup>-1</sup>, °C): 90°C (dec.); **IR** (ATR, cm<sup>-1</sup>):  $\tilde{\nu}$  = 3000 (w), 2948 (w), 1678 (s), 1664 (s), 1537 (w), 1465 (w), 1342 (w), 1271 (s), 1140 (w), 1048 (m), 989 (s), 821 (m), 771 (vs), 732 (s), 720 (s), 684 (s), 596 (s), 563 (m); **Raman** (1064 nm, 200 mW, 25 °C, cm<sup>-1</sup>):  $\tilde{\nu}$  = 2997 (54), 2859 (6), 1729 (6), 1693 (50), 1671 (10), 1465 (6), 1356 (45), 1306 (90), 1278 (13), 1148 (47), 1074 (10), 1014 (15), 855 (100), 790 (6), 778 (14), 757 (11), 734 (8), 675 (64), 626 (22), 579 (53); **<sup>1</sup>H NMR** (400 MHz,  $CDCl_3$ , 25 °C, ppm):  $\delta$ = 7.21; **<sup>13</sup>C NMR{<sup>1</sup>H}** (400 MHz,  $CDCl_3$ , 25 °C, ppm)  $\delta$ = 91.3; **BAM drophammer**: 2 J (>500  $\mu$ m); **friction tester**: < 5 N (>500  $\mu$ m).

## 2. X-ray Diffraction

To determine the molecular structures of **1** in the crystalline state an Oxford Xcalibur3 diffractometer with a Spellman generator (voltage 50 kV, current 40 mA) and a KappaCCD detector was used. The data collection was performed using the CRYSLISPro software,<sup>8</sup> The solution and refinement of the structure was performed using the program SIR-92,<sup>9</sup> and SHELXL-97<sup>10</sup> implemented in the WINGX software package<sup>11</sup> and finally checked with the PLATON software.<sup>12</sup> The absorptions were corrected with the SCAL3 ABSPACK multi-scan method.<sup>13</sup>

The crystals used for XRD unfortunately had twinning problems. Therefore we have done twin integration using the following two twin matrices: Species 1 1.0000 0.0000 0.0000 0.0000 1.0000 0.0000 0.0000 0.0000 0.0000 1.0000; Species 2 1.0000 -0.0007 0.2499 0.0000 -1.0001 0.0003 0.0001 0.0003 -1.0001.

| 1                                        |                                                              |
|------------------------------------------|--------------------------------------------------------------|
| Formula                                  | C <sub>2</sub> H <sub>2</sub> N <sub>4</sub> O <sub>10</sub> |
| FW [g mol <sup>-1</sup> ]                | 274.08                                                       |
| Crystal system                           | Monoclinic                                                   |
| Space Group                              | <i>P</i> 2 <sub>1</sub> / <i>c</i> (No. 14)                  |
| Color / Habit                            | Colorless rod                                                |
| Size [mm]                                | 0.05 x 0.30 x 0.42                                           |
| <i>a</i> [Å]                             | 7.5489(4)                                                    |
| <i>b</i> [Å]                             | 7.2995(3)                                                    |
| <i>c</i> [Å]                             | 8.3759(8)                                                    |
| α [°]                                    | 90                                                           |
| β [°]                                    | 97.935(6)                                                    |
| γ [°]                                    | 90                                                           |
| <i>V</i> [Å <sup>3</sup> ]               | 457.12(5)                                                    |
| <i>Z</i>                                 | 2                                                            |
| ρ <sub>calc.</sub> [g cm <sup>-3</sup> ] | 1.991                                                        |
| μ [mm <sup>-1</sup> ]                    | 0.216                                                        |
| <i>F</i> (000)                           | 276                                                          |
| λ <sub>MoKα</sub> [Å]                    | 0.71073                                                      |
| <i>T</i> [K]                             | 173                                                          |
| θ min-max [°]                            | 4.4, 27.0                                                    |
| Dataset <i>h</i> ; <i>k</i> ; <i>l</i>   | -9:9; -9:9; -10: 10                                          |
| Reflect. coll.                           | 1801                                                         |
| Independ. refl.                          | 1801                                                         |
| <i>R</i> <sub>int</sub>                  | ---                                                          |
| Reflection obs.                          | 1366                                                         |
| No. parameters                           | 87                                                           |
| <i>R</i> <sub>1</sub> (obs)              | 0.0274                                                       |
| <i>wR</i> <sub>2</sub> (all data)        | 0.0675                                                       |
| <i>S</i>                                 | 0.94                                                         |
| Resd. Dens.[e Å <sup>-3</sup> ]          | -0.19, 0.17                                                  |
| Device type                              | Oxford XCalibur3 CCD                                         |
| Solution                                 | SIR-92                                                       |
| Refinement                               | SHELXL-97                                                    |
| Absorpt. corr.                           | multi-scan                                                   |
| CCDC                                     | 1420413                                                      |

### 3. Heat of Formation Calculation

The heat of formation was calculated using the atomization method (equation S1) using the atom enthalpies summarized in Table S1

$$\Delta_f H^\circ_{(g, M, 298)} = H_{(Molecule, 298)} - \sum H^\circ_{(Atoms, 298)} + \sum \Delta_f H^\circ_{(Atoms, 298)} \quad (S1)$$

**Table S1** CBS-4M electronic enthalpies for atoms C, H, N and O and their literature values for atomic  $\Delta_f H^\circ_{298} / \text{kJ mol}^{-1}$

|   | $-H^{298} / \text{a.u.}$ | NIST <sup>14</sup> |
|---|--------------------------|--------------------|
| H | 0.500991                 | 218.2              |
| C | 37.786156                | 717.2              |
| N | 54.522462                | 473.1              |
| O | 74.991202                | 249.5              |

Quantum chemical calculations were carried out using the Gaussian G09 program package.<sup>15</sup> The enthalpies (H) and free energies (G) were calculated using the complete basis set (CBS) method of Petersson and coworkers in order to obtain very accurate energies. The CBS models use the known asymptotic convergence of pair natural orbital expressions to extrapolate from calculations using a finite basis set to the estimated CBS limit. CBS-4 begins with an HF/3-21G(d) geometry optimization; the zero point energy is computed at the same level. It then uses a large basis set SCF calculation as a base energy, and an MP2/6-31+G calculation with a CBS extrapolation to correct the energy through second order. An MP4(SDQ)/6-31+ (d,p) calculation is used to approximate higher order contributions. In this study, we applied the modified CBS.

The gas phase enthalpy of formation of **1** was converted to the solid state one by subtraction of a calculated sublimation enthalpy using the Trouton's rule ( $\Delta H_{\text{sub}} = 188 \cdot T_m = 72.0 \text{ kJ mol}^{-1}$ ). The molar standard enthalpy of formation ( $\Delta H_m$ ) was used to calculate the molar solid state energy of formation ( $\Delta U_m$ ) according to equation S2.

$$\Delta U_m = \Delta H_m - \Delta n RT \quad (S2)$$

( $\Delta n$  being the change of moles of gaseous components)

**Table S2.** Heat of formation calculation results.

| M        | $-H^{298} \text{ [a]} / \text{a.u.}$ | $\Delta_f H^\circ(g, M) \text{ [b]}$<br>/ $\text{kJ mol}^{-1}$ | $\Delta_{\text{sub}} H^\circ(M) \text{ [c]}$<br>/ $\text{kJ mol}^{-1}$ | $\Delta_f H^\circ(s) \text{ [d]}$<br>/ $\text{kJ mol}^{-1}$ | $\Delta n$ | $\Delta_f U(s) \text{ [e]}$<br>/ $\text{kJ kg}^{-1}$ |
|----------|--------------------------------------|----------------------------------------------------------------|------------------------------------------------------------------------|-------------------------------------------------------------|------------|------------------------------------------------------|
| <b>1</b> | 1197.253051                          | -321.6                                                         | 63.0                                                                   | -384.6                                                      | 9          | -1321.9                                              |

[a] CBS-4M electronic enthalpy; [b] gas phase enthalpy of formation; [c] sublimation enthalpy; [d] standard solid state enthalpy of formation; [e] solid state energy of formation.

## 4. References

- 
- 1 NATO Standardization Agreement (STANAG) on Explosives, *Impact Sensitivity Tests*, no. 4489, 1st Edn., September 17, **1999**.
  - 2 WIWEB-Standardarbeitsanweisung 4-5.1.02, Ermittlung der Explosionsgefährlichkeit, hier der Schlagempfindlichkeit mit dem Fallhammer, November 8, **2002**.
  - 3 <http://www.bam.de>.
  - 4 NATO Standardization Agreement (STANAG) on Explosives, *Friction Sensitivity Tests*, no. 4487, 1st Edn., August 22, **2002**.
  - 5 WIWEB-Standardarbeitsanweisung 4-5.1.03, Ermittlung der Explosionsgefährlichkeit oder der Reibeempfindlichkeit mit dem Reibeapparat, November 8, **2002**.
  - 6 Impact: Insensitive >40 J, less sensitive  $\leq 35$  J, sensitive  $\leq 4$  J, very sensitive  $\leq 3$  J; friction: Insensitive >360 N, less sensitive = 360 N, sensitive <360 N a. >80 N, very sensitive  $\leq 80$  N, extreme sensitive  $\leq 10$  N; According to the UN Recommendations on the Transport of Dangerous Goods (+) indicates: not safe for transport.
  - 7 <http://www.ozm.cz>.
  - 8 *CrysAlisPro*, Agilent Technologies, **2014**.
  - 9 A. Altomare, G. Casciaro, C. Giacovazzo, A. Guagliardi, Completion and Refinement of Crystal Structures with SIR92, *J. Appl. Crystallogr.* **1993**, 26, 343-350.
  - 10 G. M. Sheldrick, *SHELXL-97, Program for the Refinement of Crystal Structures*, University of Göttingen, Göttingen, Germany **1994**.
  - 11 L. J. Farrugia, WinGX Suite for Small-molecule Single-crystal Crystallography, *J. Appl. Crystallogr.* **1999**, 32, 837-838.
  - 12 A. L. Spek, PLATON, *A Multipurpose Crystallographic Tool*, Utrecht, The Netherlands **1999**.
  - 13 SCALE3 ABSPACK-An Oxford Diffraction Program, Oxford Diffraction Ltd., **2005**.
  - 14 P. J. Lindstrom, W. G. Mallard (Editors), NIST Standard Reference Database Number 69, <http://webbook.nist.gov/chemistry/> (Juni **2011**).
  - 15 M. J. Frisch, G. W. Trucks, H. B. Schlegel, G. E. Scuseria, M. A. Robb, J. R. Cheeseman, G. Scalmani, V. Barone, B. Mennucci, G. A. Petersson, H. Nakatsuji, M. Caricato, X. Li, H.P. Hratchian, A. F. Izmaylov, J. Bloino, G. Zheng, J. L. Sonnenberg, M. Hada, M. Ehara, K. Toyota, R. Fukuda, J. Hasegawa, M. Ishida, T. Nakajima, Y. Honda, O. Kitao, H. Nakai, T.

---

Vreven, J. A. Montgomery, Jr., J. E. Peralta, F. Ogliaro, M. Bearpark, J. J. Heyd, E. Brothers, K. N. Kudin, V. N. Staroverov, R. Kobayashi, J. Normand, K. Raghavachari, A. Rendell, J. C. Burant, S. S. Iyengar, J. Tomasi, M. Cossi, N. Rega, J. M. Millam, M. Klene, J. E. Knox, J. B. Cross, V. Bakken, C. Adamo, J. Jaramillo, R. Gomperts, R. E. Stratmann, O. Yazyev, A. J. Austin, R. Cammi, C. Pomelli, J. W. Ochterski, R. L. Martin, K. Morokuma, V. G. Zakrzewski, G. A. Voth, P. Salvador, J. J. Dannenberg, S. Dapprich, A. D. Daniels, O. Farkas, J.B. Foresman, J. V. Ortiz, J. Cioslowski, D. J. Fox, Gaussian 09 A.02, Gaussian, Inc., Wallingford, CT, USA, **2009**.
